## Correction

# Correction: SinR Controls Enterotoxin Expression in *Bacillus thuringiensis* Biofilms

The PLOS ONE Staff

The figure legends for Figure 4 and Figure 5 contain misnumbered subfigures in the PDF and XML versions of the article. Please see these figures and their corrected figure legends below.

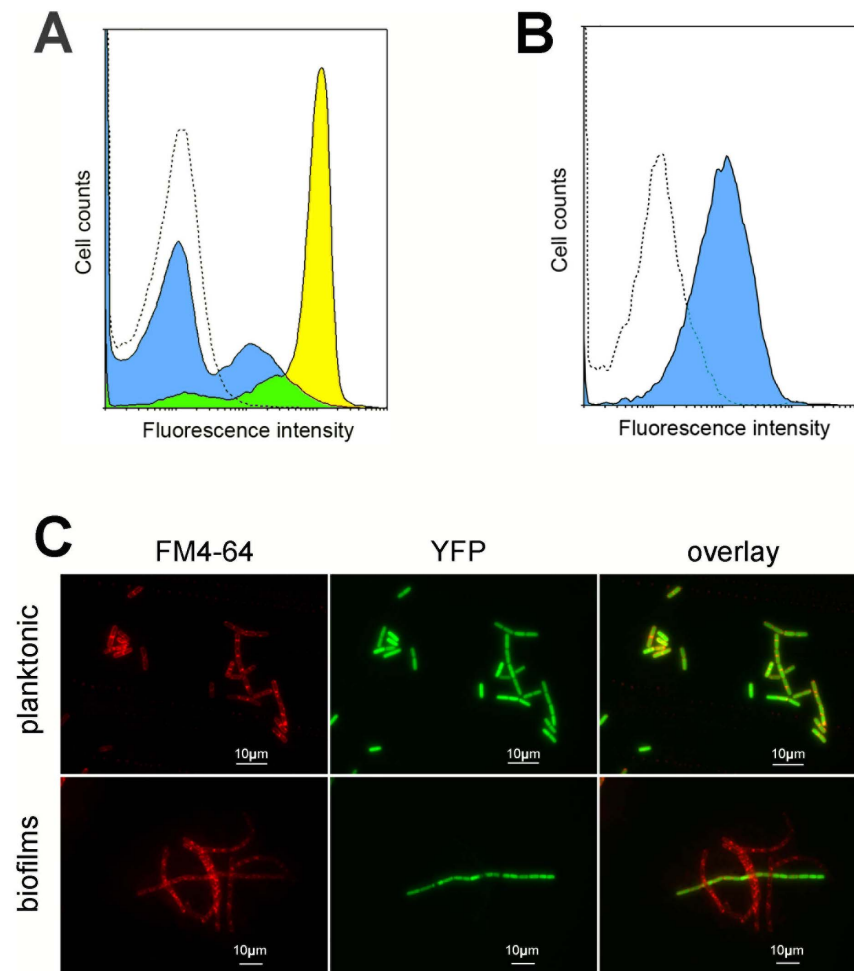

**Figure 4. Heterogeneity of *hbl* expression in planktonic cultures and in biofilms.** A: Flow cytometry analysis of bacteria expressing  $P_{hbl}'-yfp$  in planktonic cultures or in biofilms, shown as histogram plot. The blue-filled curve shows biofilm data, the yellow-filled curve shows planktonic cultures data and the unfilled dashed curve shows data from bacteria lacking *yfp*. B: Flow cytometry analysis of bacteria expressing  $P_{aphta3}'-yfp$  in biofilms (blue-filled curve) compared to bacteria lacking *yfp* (unfilled dashed curve), shown as histogram plot. C: Expression from the *hbl* promoter was monitored in planktonic cultures and in biofilms by epifluorescence microscopy through a transcriptional fusion to *yfp*. Cell limits are shown by the membrane stain FM4-64 (red).  
doi:10.1371/journal.pone.0087532.g004

**Citation:** The PLOS ONE Staff (2014) Correction: SinR Controls Enterotoxin Expression in *Bacillus thuringiensis* Biofilms. PLoS ONE 9(4): e96707. doi:10.1371/journal.pone.0096707

**Published:** April 25, 2014

**Copyright:** © 2014 The PLOS ONE Staff. This is an open-access article distributed under the terms of the Creative Commons Attribution License, which permits unrestricted use, distribution, and reproduction in any medium, provided the original author and source are credited.

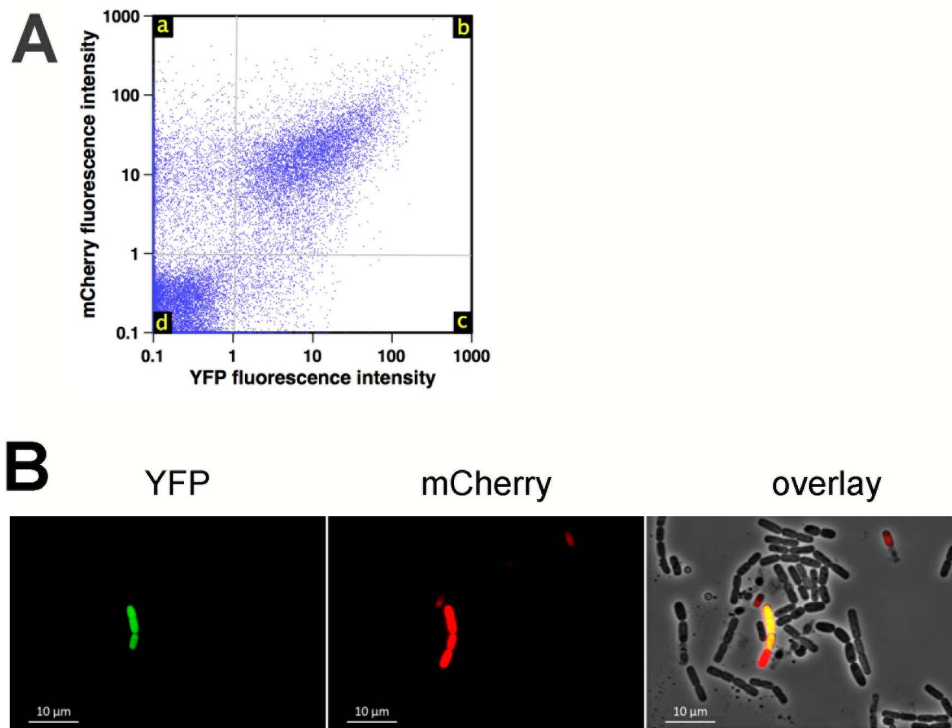

**Figure 5. Expression of *hbl* and of *sinI* in biofilms.** A: Flow cytometry analysis of bacteria expressing  $P_{hbl}$ -*yfp* and  $P_{sinI}$ -*mcherry* in 48 h-old biofilms, shown as dot-plot. While 72% of the bacteria do not express *hbl* nor *sinI* (quadrant d), 15% of the cells which express *hbl* also express *sinI* (quadrant b), and 12% of the bacteria express *sinI* but not *hbl* (quadrant a). B: Observation by epifluorescence microscopy of bacteria expressing  $P_{hbl}$ -*yfp* (left, in green) and  $P_{sinI}$ -*mcherry* (center, in red) in 48 h-old biofilms. An overlay of YFP fluorescence (*hbl* expression), mCherry fluorescence (*sinI* expression) and phase contrast microscopy is shown on the right.  
doi:10.1371/journal.pone.0087532.g005

## Reference

1. Fagerlund A, Dubois T, Økstad O-A, Verplaetse E, Gilois N, et al. (2014) SinR Controls Enterotoxin Expression in *Bacillus thuringiensis* Biofilms. PLoS ONE 9(1): e87532. doi:10.1371/journal.pone.0087532
